# Supplementary material for: Design and evaluation of Actichip, a thematic microarray for the study of the actin cytoskeleton
Source: PubMed Central journal article supplement (PMC2077341; doi:10.1186/1471-2164-8-294), 2007-08-29

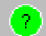

### Design for ACTA2

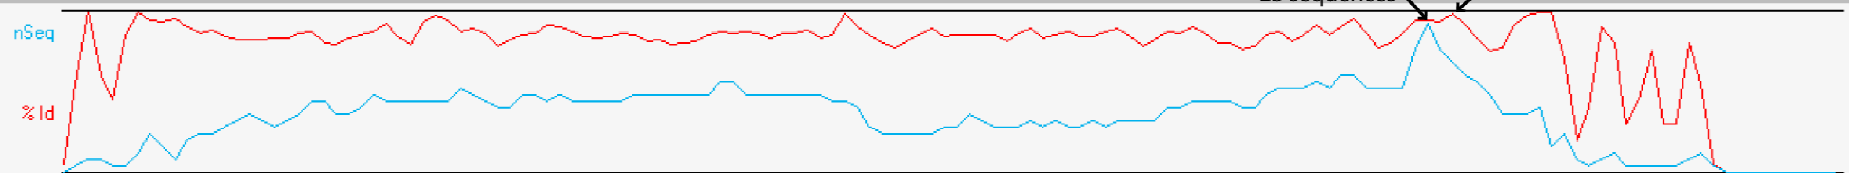

1

1438

200974\_at →

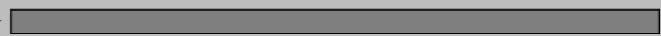

Affymetrix Probe Set

Operon Probe

Actichip Probe

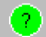

### Design for ACTG2

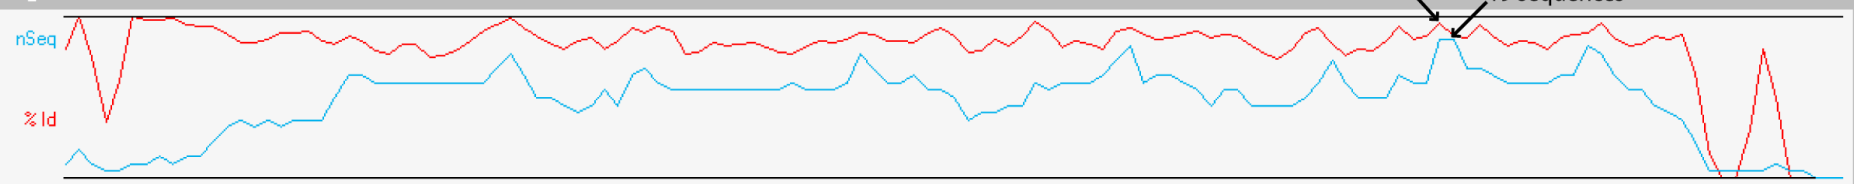

1

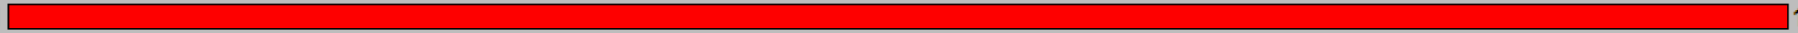

1322

202274\_at →

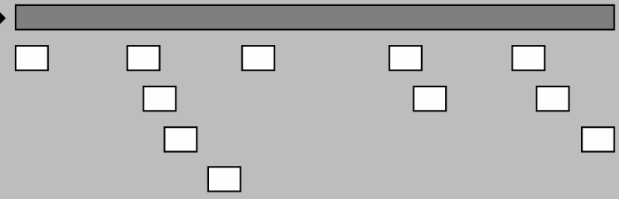

Affymetrix Probe Set

Operon Probe

Actichip Probe

Design for ACTB

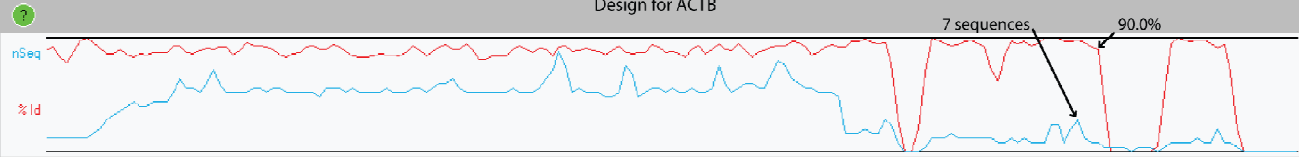

1 1884

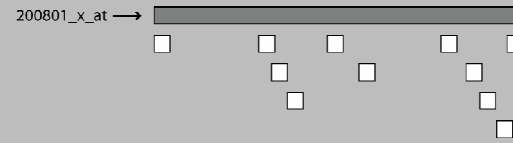

Affymetrix Probe Set

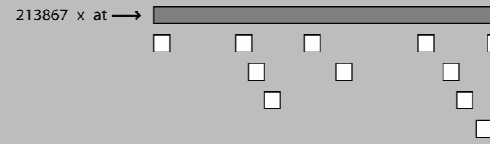

Affymetrix Probe Set

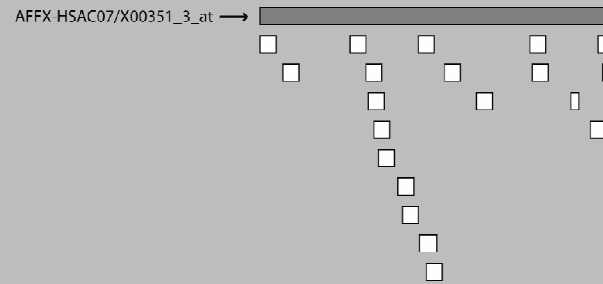

Affymetrix Probe Set

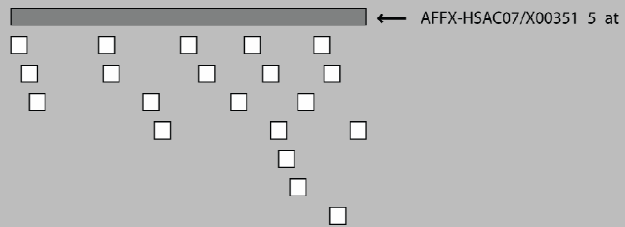

Affymetrix Probe Set

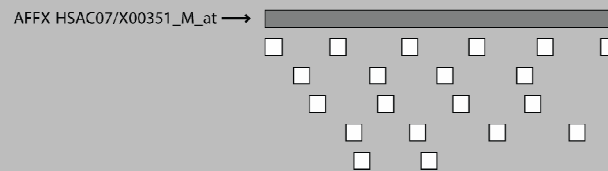

Affymetrix Probe Set

Operon Probe

Actichip Probe

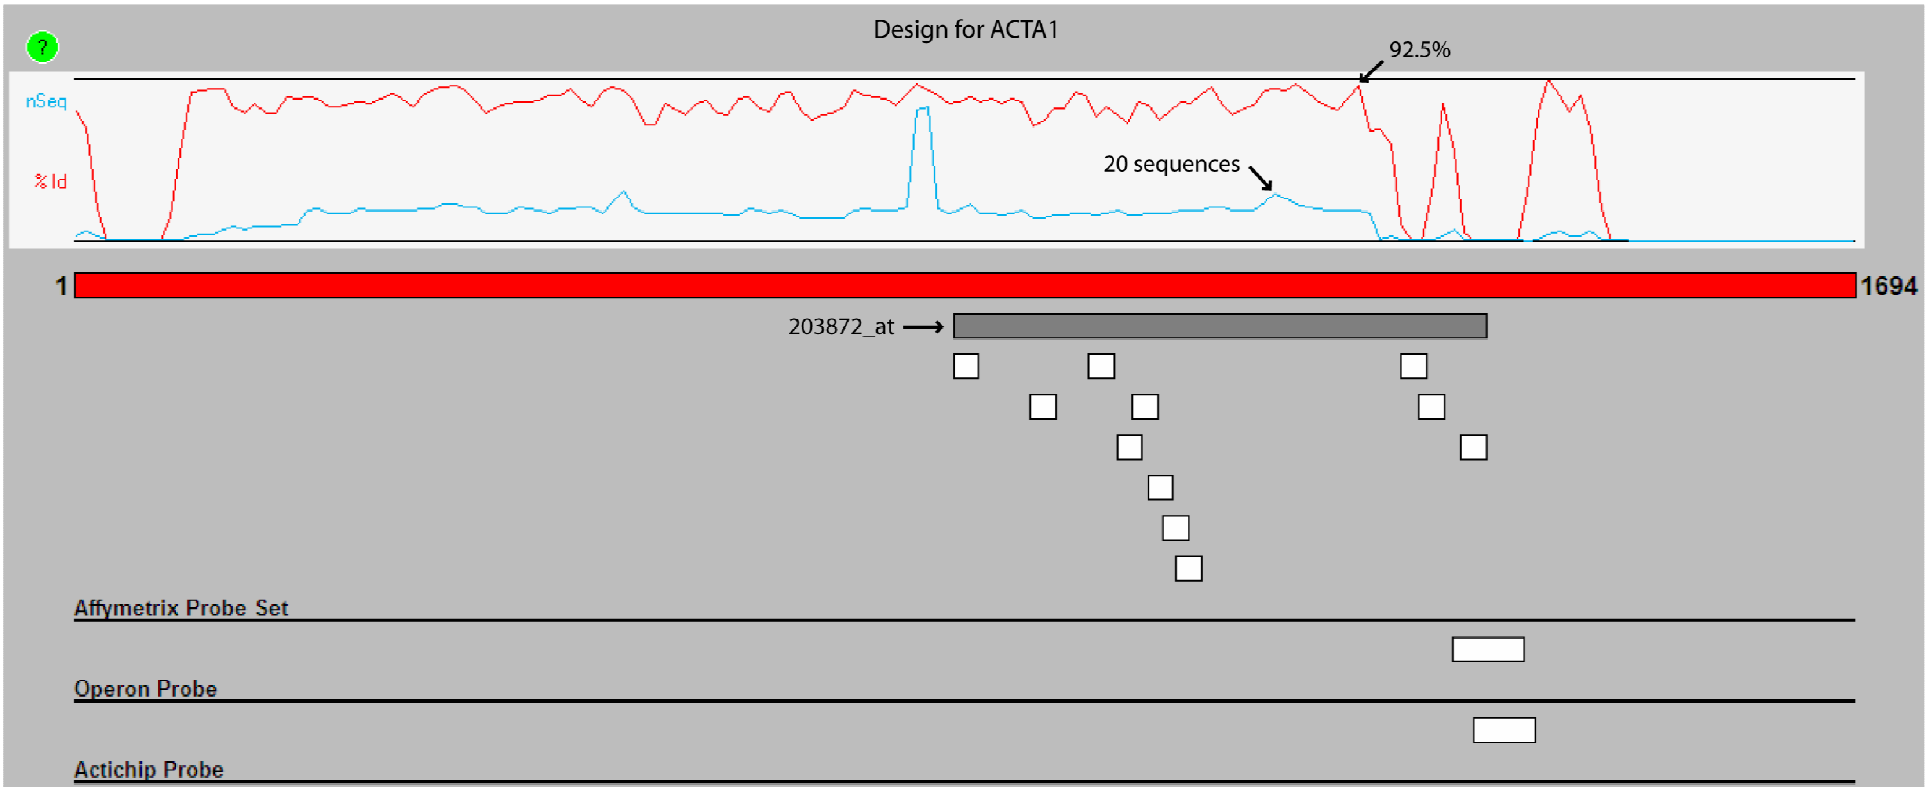

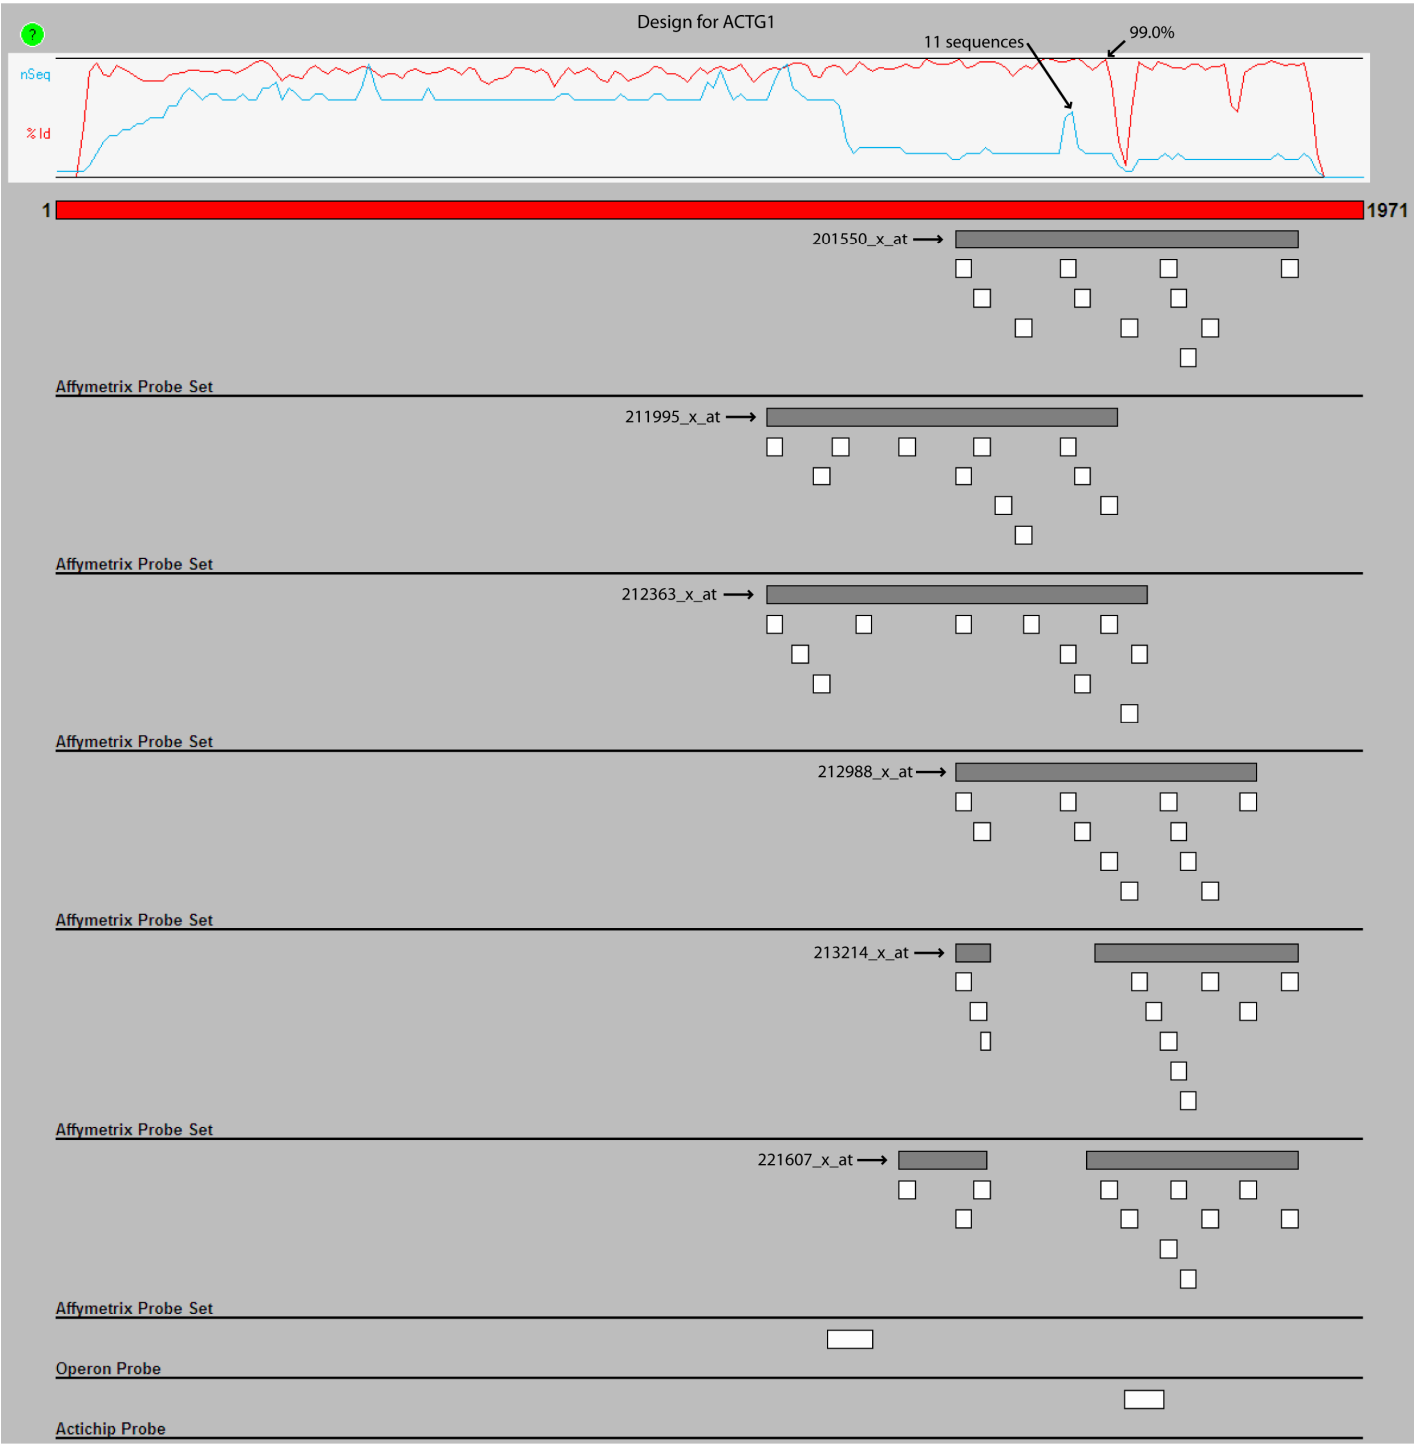

Design for ACTC

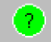

nSeq

% Id

19 sequences

94.3%

1

1549

205132\_at →

Affymetrix Probe Set

Actichip Probe

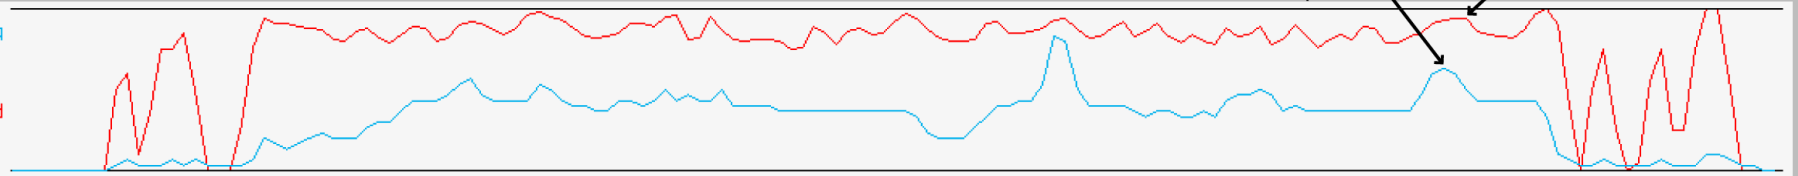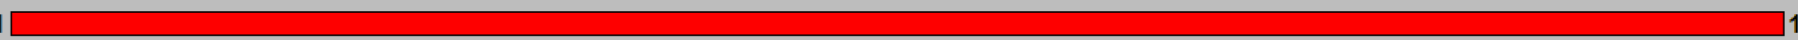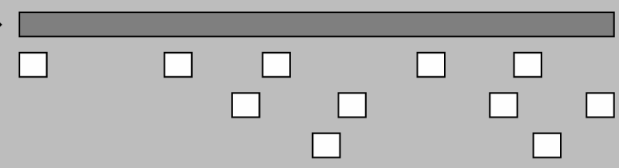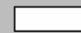

Supplement: 1471-2164-8-294-S3.pdf [file 1471-2164-8-294-S3.pdf]
