# Supplementary material for: Design and evaluation of Actichip, a thematic microarray for the study of the actin cytoskeleton
Source: PubMed Central journal article supplement (PMC2077341; doi:10.1186/1471-2164-8-294), 2007-08-29
Supplement: 1471-2164-8-294-S2.pdf [file 1471-2164-8-294-S2.pdf]

**Human genome oligonucleotide set, version 2 (Operon)**

| Microarray Platform | Gene name | GenBank Accession Number | RefSeq Accession Number | Uniprot ID Accession Number | Definition                                                                                                                                                                |
|---------------------|-----------|--------------------------|-------------------------|-----------------------------|---------------------------------------------------------------------------------------------------------------------------------------------------------------------------|
|                     | RPSA      | BC005391                 | NM_002295               | P08865                      | 40S ribosomal protein SA (P40) (34/67 kDa laminin receptor) (Colon carcinoma laminin-binding protein) (NEM/1CHD4) (Multidrug resistance- associated protein MGr1-Ag).     |
|                     | ACTC1     | BC009978                 | NM_005159               | P04270                      | Actin, alpha, cardiac muscle 1 (ACTC1).                                                                                                                                   |
|                     | ANK2      | X56958                   | NM_020977               | Q01484                      | Ankyrin 2 (Brain ankyrin) (Ankyrin B) (Ankyrin, nonerythroid).                                                                                                            |
|                     | ANXA2     | BC001388                 | NM_004039               | AAH52567                    | Annexin A2 (Annexin II) (Lipocortin II) (Calpactin I heavy chain) (Chromobindin 8) (P36) (Protein I) (Placental anticoagulant protein IV) (PAP-IV).                       |
|                     | DST       | AF400226                 | NM_015548               | O94833                      | Bullous pemphigoid antigen 1, isoforms 6/9/10 (Trabeculin-beta) (Bullous pemphigoid antigen) (BPA) (Hemidesmosomal plaque protein) (Dystonia musculorum protein).         |
|                     | CLMN      | AB047979                 | NM_024734               | Q96JQ2                      | Calmin (calponin-like, transmembrane).                                                                                                                                    |
|                     | CDC42     | M57298                   | NM_001791               | P21181                      | Cell division control protein 42 homolog (G25K GTP-binding protein).                                                                                                      |
|                     | DAAM1     | AK093813                 | NM_014992               | Q8N1Z8                      | Dishevelled associated activator of morphogenesis 1 (DAAM1).                                                                                                              |
|                     | DMD       | BC028720                 | NM_004016               | Q8N754                      | Dystrophin (Muscular dystrophy, Duchenne and Becker types).                                                                                                               |
|                     | EEF1A1    | AF267861                 | NM_001402               | Q9H2I7                      | EF1a-like protein.                                                                                                                                                        |
|                     | EEF1G     | AF119850                 | NM_001404               | AAH28179                    | Eukaryotic translation elongation factor 1 gamma (EEF1G).                                                                                                                 |
|                     | EVL       | BC023997                 | NM_016337               | Q9UI08                      | Ena/vasodilator stimulated phosphoprotein-like protein (Ena/VASP-like protein).                                                                                           |
|                     | FN1       | AJ535086                 | NM_054034               | P02751                      | Fibronectin precursor (FN) (Cold-insoluble globulin) (CIG).                                                                                                               |
|                     | GAS2      | BC040470                 | NM_177553               | O43903                      | Growth-arrest-specific protein 2 (GAS-2).                                                                                                                                 |
|                     | DSG4      | BC039098                 | NM_177986               | ACT0999                     | Desmoglein 4, mRNA (cDNA clone IMAGE:4822945), partial cds.                                                                                                               |
|                     | SSH1      | AB072355                 | NM_018984               | Q8WYL5                      | Slingshot homolog 1 (Drosophila) (SSH1).                                                                                                                                  |
|                     | SSH2      | AB072358                 | NM_033389               | Q8WYL2                      | Slingshot homolog 2 (Drosophila) (SSH2).                                                                                                                                  |
|                     | BIN1      | AL713697                 | NM_139343               | CAD28496                    | Bridging integrator 1 (BIN1).                                                                                                                                             |
|                     | TPM3      | AK092690                 | NM_152263               | Q8NAH0                      | Tropomyosin 3 (TPM3).                                                                                                                                                     |
|                     | ITGB1     | X07979                   | NM_002211               | P05556                      | Integrin beta-1 precursor (Fibronectin receptor beta subunit) (CD29 antigen) (Integrin VLA-4 beta subunit).                                                               |
|                     | JUP       | BC011865                 | NM_021991               | Q9BWC4                      | Junction plakoglobin.                                                                                                                                                     |
|                     | KRT8      | X74929                   | NM_002273               | P05787                      | Keratin, type II cytoskeletal 8 (Cytokeratin 8) (K8) (CK 8).                                                                                                              |
|                     | LSP1      | BC001785                 | NM_002339               | P33241                      | Lymphocyte-specific protein 1 (Protein pp52) (52 kDa phosphoprotein) (Lymphocyte-specific antigen WP34) (47 kDa actin binding protein).                                   |
|                     | MACF1     | AF141968                 | NM_012090               | Q9UPN3                      | Microtubule-actin crosslinking factor 1, isoforms 1/2/3 (Actin cross-linking family protein 7) (Macrophin 1) (Trabeculin-alpha) (620 kDa actin-binding protein) (ABP620). |
|                     | MYO1F     | AK092877                 | NM_012335               | O00160                      | Myosin If (Myosin-IE).                                                                                                                                                    |
|                     | NRAP      | AY081943                 | NM_006175               | Q8TCH0                      | Nebulin-related anchoring protein.                                                                                                                                        |
|                     | SYNE1     | AF495910                 | NM_033071               | Q8NF91                      | Nesprin 1 (Nuclear envelope spectrin repeat protein 1) (Synaptic nuclear envelope protein 1) (Syne-1) (Myocyte nuclear envelope protein 1) (Myne-1) (Enaptin).            |
|                     | PDCD6IP   | BC020066                 | NM_013374               | Q8WUM4                      | Programmed cell death 6 interacting protein (ALG-2 interacting protein 1) (Hp95).                                                                                         |

**GeneChip HG-U133A 2.0 (Affymetrix)**

|  |         |          |           |          |                                                                            |
|--|---------|----------|-----------|----------|----------------------------------------------------------------------------|
|  | CFLP1   | BC031631 | NM_152427 | Q8N1B5   | Similar to cofilin, non-muscle isoform (18 kDa phosphoprotein) (P18).      |
|  | TLN2    | AF402000 | NM_015059 | Q9Y4G6   | Talin 2.                                                                   |
|  | TMSB4X  | BC016732 | NM_021109 | CAC43317 | Thymosin beta-4.                                                           |
|  | TNNT2   | X74819   | NM_000364 | P45379   | Troponin T, cardiac muscle isoforms (TnTC) (cTnT).                         |
|  | TMOD3   | BC020542 | NM_014547 | Q9NYL9   | Ubiquitous tropomodulin (U-Tmod) (Tropomodulin 3).                         |
|  | ANLN    | AF273437 | NM_018685 | Q9NQW6   | Actin binding protein anillin.                                             |
|  | ACTRT2  | AF440740 | NM_080431 | Q8TDG1   | Actin-related protein T2.                                                  |
|  | SCIN    | BC021090 | NM_033128 | Q9Y6U3   | Adseverin (Scinderin).                                                     |
|  | ANGPTL6 | AB054064 | NM_031917 | Q8NI99   | ARP3.                                                                      |
|  | AXIN2   | AF078165 | NM_004655 | Q9Y2T1   | Axin 2 (Axis inhibition protein 2) (Conductin) (Axin-like protein) (Axil). |
|  | ADD2    | X58199   | NM_001617 | P35612   | Adducin 2 (beta) (ADD2) (Beta adducin) (Erythrocyte adducin beta subunit). |
|  | DBNL    | AF151364 | NM_014063 | Q9NR72   | Cervical SH3P7 (Mucin-associated protein).                                 |
|  | CFL2    | AF134802 | NM_021914 | Q9Y281   | Cofilin, muscle isoform (Cofilin 2).                                       |
|  | CTTNBP2 | AF377960 | NM_033427 | Q8WZ74   | Cortactin-binding protein 2 (Hypothetical protein KIAA1758).               |
|  | NKD1    | BC051288 | NM_033119 | Q969G9   | Dvl-binding protein NKD1 (Naked cuticle-1) (Naked protein).                |
|  | PARVG   | BC034406 | NM_022141 | Q9HBI0   | Gamma-parvin.                                                              |
|  | ARPM1   | AK055346 | NM_032487 | Q96NJ0   | Actin-related protein M1 (ARPM1)                                           |
|  | ACTRT1  | BC014597 | NM_138289 | Q96L10   | Actin-related protein T1 (ACTRT1)                                          |
|  | DSG4    | BC039098 | NM_177986 | ACT0999  | Desmoglein 4, mRNA (cDNA clone IMAGE:4822945), partial cds.                |
|  | SSH1    | AB072355 | NM_018984 | Q8WYL5   | Slingshot homolog 1 (Drosophila) (SSH1).                                   |
|  | SSH2    | AB072358 | NM_033389 | Q8WYL2   | Slingshot homolog 2 (Drosophila) (SSH2).                                   |
|  | ESPN    | AL136880 | NM_031475 | Q9H0A2   | Espin (ESPN).                                                              |
|  | LAMA5   | ACT0412  | NM_005560 | O15230   | Laminin alpha-5 chain precursor.                                           |
|  | MYO1C   | X98507   | NM_033375 | O00159   | Myosin 1c (Myosin I beta) (MMI-beta) (MMIb).                               |
|  | RHOJ    | AK027351 | NM_020663 | Q9H4E5   | Rho-related GTP-binding protein RhoJ (Tc10-like GTP-binding protein TCL).  |
|  | CFLP1   | BC031631 | NM_152427 | Q8N1B5   | Similar to cofilin, non-muscle isoform (18 kDa phosphoprotein) (P18).      |
|  | TMOD4   | AF177173 | NM_013353 | Q9NZQ9   | Skeletal muscle tropomodulin (Sk-Tmod) (Tropomodulin 4).                   |
|  | TLN2    | AF402000 | NM_015059 | Q9Y4G6   | Talin 2.                                                                   |
