# Supplementary material for: Design and evaluation of Actichip, a thematic microarray for the study of the actin cytoskeleton
Source: PubMed Central journal article supplement (PMC2077341; doi:10.1186/1471-2164-8-294), 2007-08-29
Supplement: 1471-2164-8-294-S7.pdf [file 1471-2164-8-294-S7.pdf]

Query Sequence (QSeq)

$$\begin{aligned} \Sigma(111111111111111111111111111111111111) &= \text{TNRM}_{\text{QSeq}} = 32 \\ \Sigma(111011110111111111111011110101111) &= \text{TNAR}_{\text{QSeq}} = 27 \end{aligned}$$

ATCGTAGCGGATCGTCT  
| | | | | | | | | |  
ATCTTAGCCGATCGTAT

:MSP1

CGTCTATGCGCGTATAGCTG  
| | | | | | | | | |  
CTTCTATGAGCGTCTGGCTG

:MSP2

$$\begin{aligned} \Sigma(11101111011111101) &= \text{TNAR}_{\text{SeqB}} = 30 \\ \Sigma(1111111111111111) &= \text{TNRM}_{\text{SeqB}} = 37 \end{aligned}$$

One sequence in Blast (SeqB)

$$\text{GID}_{\text{SeqB}} = \frac{\text{TNAR}_{\text{SeqB}}}{\text{TNRM}_{\text{SeqB}}} \times 100 = \frac{30}{37} \times 100 = 81.1\%$$

TNAR: Total Number of Aligned Residue

TNRM: Total Number of Residue in MSP (*Maximum Segment Pair*)

GID: Global Percent Identity
